# Supplementary material for: Marker-assisted pyramiding of bacterial leaf blight resistance genes (Xa21, xa13 and xa5) in a short-duration rice cultivar Luit
Source: Research Square preprint supplement (doi:10.21203/rs.3.rs-8706341/v1), 2026-02-21
Supplement: Supplementary file 1 [file 7db8627ce9adbb78d10691e9.docx]

**Linkage groups of rice**

**
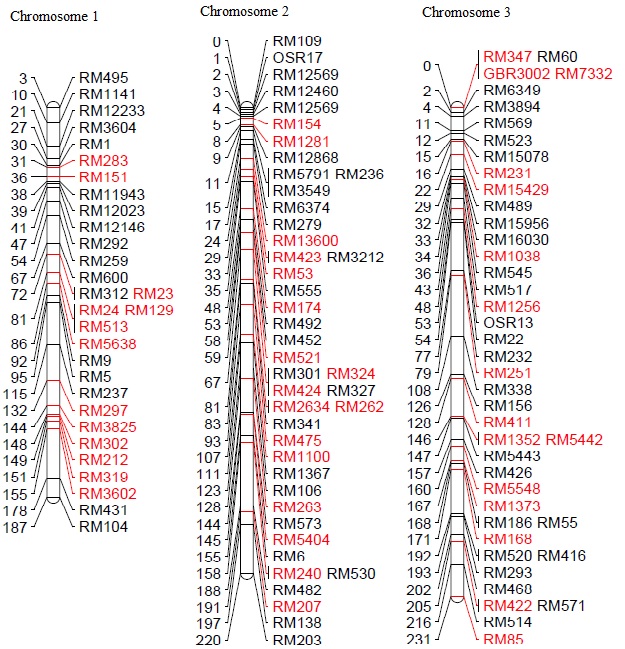
**

**Figure S2 A.** SSR Linkage group of rice genome based on parental polymorphism between all the donor and recurrent parents. Linkage group was drawn by using “Mapchart” software, SSR markers are to right and centiMorgan (cM) is to the left of the chromosomes. SSR markers and its distance (cM) based on Temnykh *et al* (2000) and Universal Core Genetic Map Orjuela *et al* (2010). The red colour indicates the polymorphic markers and the black colour indicates the monomorphic markers.

**Linkage groups of rice**

**
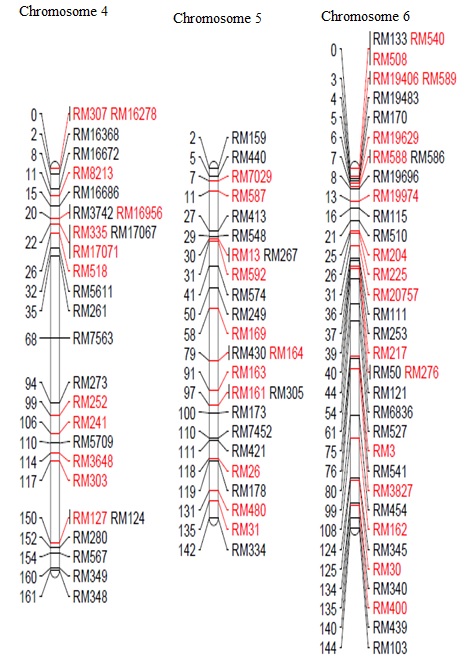
**

**Figure S2 B.** SSR Linkage group of rice genome based on parental polymorphism between all the donor and recurrent parents. Linkage group was drawn by using “Mapchart” software, SSR markers are to right and centiMorgan (cM) is to the left of the chromosomes. SSR markers and its distance (cM) based on Temnykh *et al* (2000) and Universal Core Genetic Map Orjuela *et al* (2010). The red colour indicates the polymorphic markers and the black colour indicates the monomorphic markers.

**Linkage groups of rice**

**
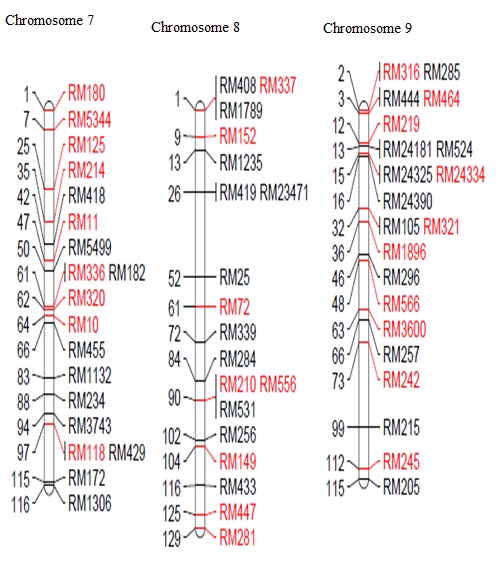
**

**Figure S2 C.** SSR Linkage group of rice genome based on parental polymorphism between all the donor and recurrent parents. Linkage group was drawn by using “Mapchart” software, SSR markers are to right and centiMorgan (cM) is to the left of the chromosomes. SSR markers and its distance (cM) based on Temnykh *et al* (2000) and Universal Core Genetic Map Orjuela *et al* (2010). The red colour indicates the polymorphic markers and the black colour indicates the monomorphic markers.

**Linkage groups of rice chromosome**

**
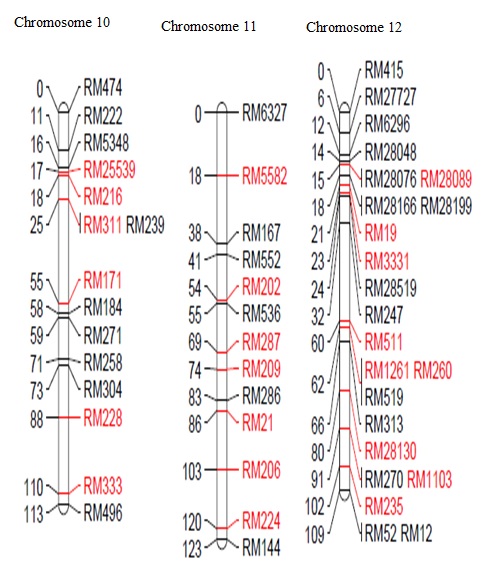
**

**Figure S2 D.** SSR Linkage group of rice genome based on parental polymorphism between all the donor and recurrent parents. Linkage group was drawn by using “Mapchart” software, SSR markers are to right and centiMorgan (cM) is to the left of the chromosomes. SSR markers and its distance (cM) based on Temnykh *et al* (2000) and Universal Core Genetic Map Orjuela *et al* (2010). The red colour indicates the polymorphic markers and the black colour indicates the monomorphic markers.
