# Supplementary material for: Marker-assisted pyramiding of bacterial leaf blight resistance genes (Xa21, xa13 and xa5) in a short-duration rice cultivar Luit
Source: Research Square preprint supplement (doi:10.21203/rs.3.rs-8706341/v1), 2026-02-21
Supplement: Supplementary file 1 [file 40c91f5c3e7328bfed37adea.docx]

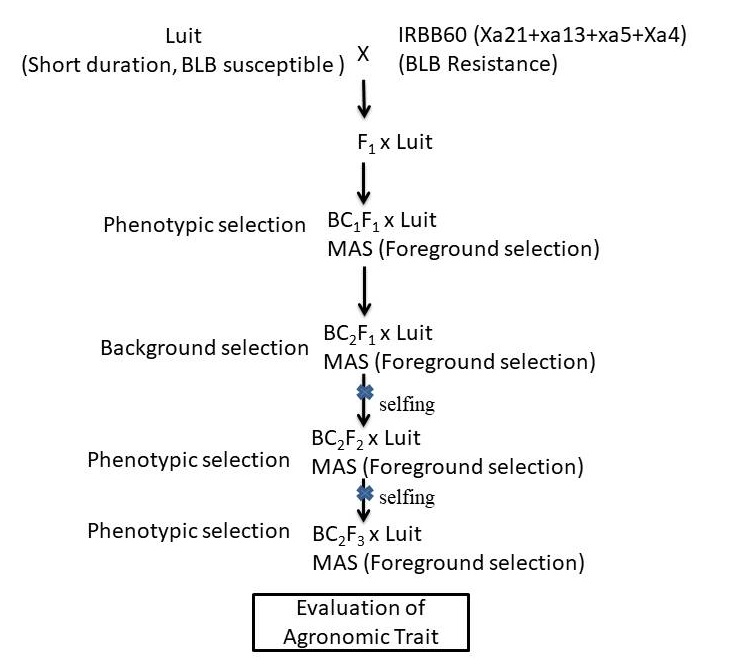


**Supplementary Figure 3.** Schematic representation of pyramiding three BLB resistance genes Xa21, xa13 and xa5 using marker-assisted foreground and background selection.
