# Supplementary material for: Marker-assisted pyramiding of bacterial leaf blight resistance genes (Xa21, xa13 and xa5) in a short-duration rice cultivar Luit
Source: Research Square preprint supplement (doi:10.21203/rs.3.rs-8706341/v1), 2026-02-21
Supplement: Supplementary file 2 [file 70ac386586752e2f0fc9130c.docx]

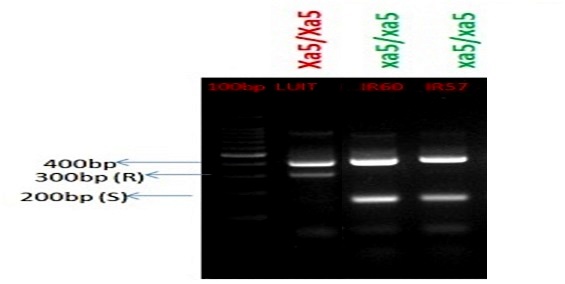


**Figure S1A:** Functional marker xa5 FM specific for *xa5* gene, PCR amplified 1.5% agarose gel of donor parents IRBB60 (Xa4+xa5+xa13+Xa21); positive control IRBB57 ( Xa4+xa5+Xa21) and recurrent parents Luit. The gel picture constitute of resistance allele of 300bp and susceptible allele of 200bp and with a common allele of 300bp in all the rice genotype compared with M-100bp ladder.


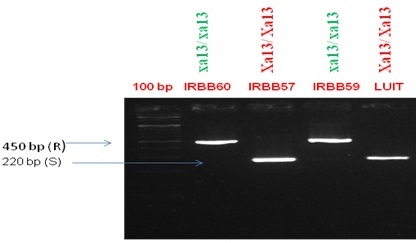


**Figure S1B:** Functional marker xa13 pro specific for *xa13* gene, PCR amplified 1.5% agarose gel of donor parents IRBB60; positive control IRBB59 (xa5+xa13+Xa21) and Negative control IRBB57 (Xa4+xa5+Xa21) as well as recurrent parents Luit. The band size of 450 bp show resistance allele and band size of 220 bp show susceptible allele compared with M-100bp ladder.


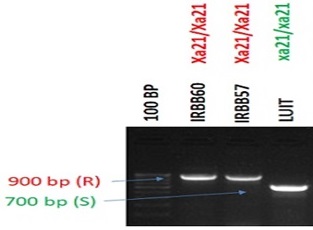


**Figure S1C:** Functional Marker pTA248 specific for *Xa21* gene, PCR amplified 1.5% agarose gel of donor parents IRBB60 (Xa4+xa5+xa13+Xa21); positive control IRBB57 (Xa4+xa5+Xa21) and recurrent parents Luit. The band sizes of 900bp show resistance allele and 700bp show susceptible allele compared with M-100bp ladder.


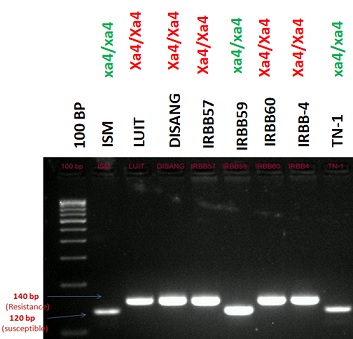


**Figure S1D:** **STS Marker Npb181 specific for *Xa4* gene, PCR amplified agarose gel of donor parents IRBB60(**Xa4+xa5+xa13+Xa21**), IRBB57(**Xa4+xa5+Xa21)**, IRBB59(**Xa4+xa13+Xa21) **and recurrent parents Luit, Disang along with Negative control TN-1 and positive control IRBB4, M-100bp ladder, 140bp showed resistance allele and 120bp showed susceptible allele**
